# Supplementary material
Source: PubMed Central journal article supplement (PMC2751663)
Supplement: NIHMS123506-supplement-Supp_Fig_S1.pdf [file NIHMS123506-supplement-Supp_Fig_S1.pdf]

chr4: | 190900000 | 191000000 | 191100000 | 191200000 | 191300000 |

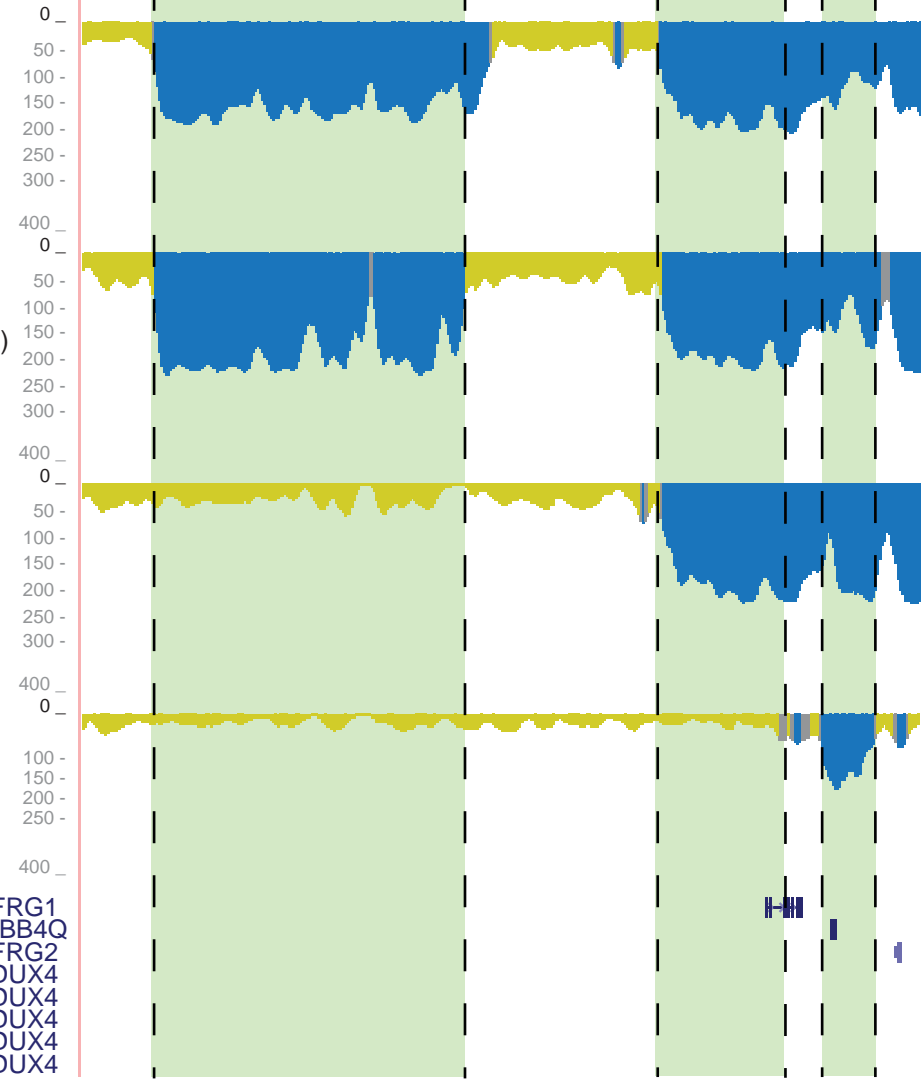

Human (HSA)  
Depth Coverage

Chimpanzee (PTR)  
Depth Coverage

Orangutan (PPY)  
Depth Coverage

Macaque (MMU)  
Depth Coverage

RefSeq Genes  
FRG1  
TUBB4Q  
FRG2  
DUX4  
DUX4  
DUX4  
DUX4  
DUX4

HSA / PTR

HSA /  
PTR /  
PPY  
HSA /  
PTR /  
PPY /  
MMU
