# Supplementary material
Source: PubMed Central journal article supplement (PMC2751663)
Supplement: NIHMS123506-supplement-Supp_Fig_S6.pdf [file NIHMS123506-supplement-Supp_Fig_S6.pdf]

Distribution of percentages of copy number in nonredundant sub-Unit SDs

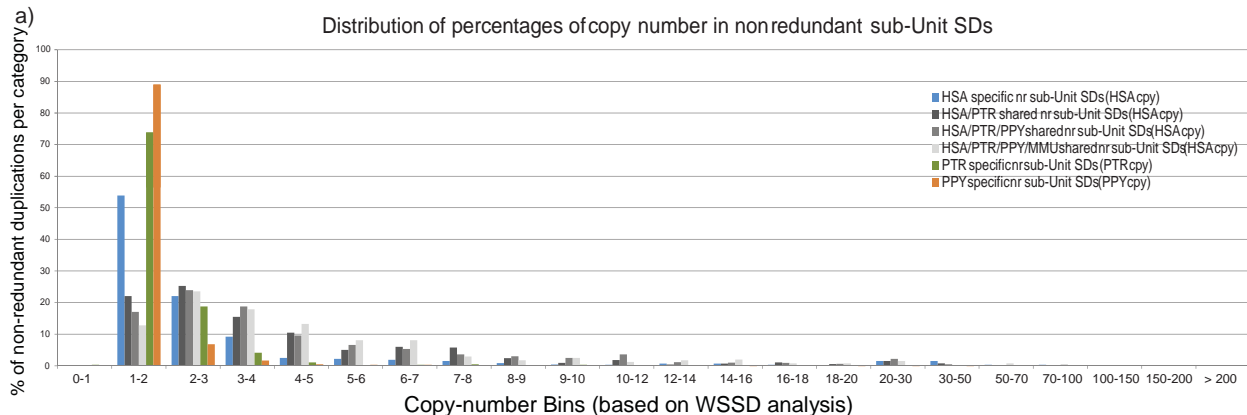

b)

| Category APE SDs                    | Total #N | Sum of sub-unit Size | Average Size of sub-Unit SDs | Median of Cpy_HSA | Median of Cpy_PTR | Median of Cpy_PPY |
|-------------------------------------|----------|----------------------|------------------------------|-------------------|-------------------|-------------------|
| HSA specific sub-Unit SDs           | 740      | 7,268,951            | 9,822.90                     | 1.94***           | 1.12              | 0.88              |
| HSA/PTR shared sub-Unit SDs         | 784      | 8,247,488            | 10,519.75                    | 3.11              | 2.77              | 0.93              |
| HSA/PTR/PPY shared sub-Unit SDs     | 698      | 3,608,545            | 5,169.83                     | 3.41              | 3.19              | 2.86              |
| HSA/PTR/PPY/MMU shared sub-Unit SDs | 408      | 1,815,531            | 4,449.83                     | 3.70              | 3.51              | 2.81              |
| PTR specific SDs                    | 1,086    | 11,181,508           | 10,296.04                    | 1.07              | 1.78              | 1.09              |
| PPY specific SDs                    | 3,633    | 30,348,197           | 8,353.48                     | 1.04              | 1.20              | 1.59              |
| Grand Total                         | 7,349    | 62,470,220           | 8,500.50                     | 1.17              | 1.42              | 1.54              |

\*\*\* The median of HSA specific nr sub-units SDs (1.94) is statistically different (Kolmogorov-Smirnov Test  $P < 2.2e-16$ ) than the median of HSA shared (3.37).
