# Supplementary material
Source: PubMed Central journal article supplement (PMC2751663)

a)

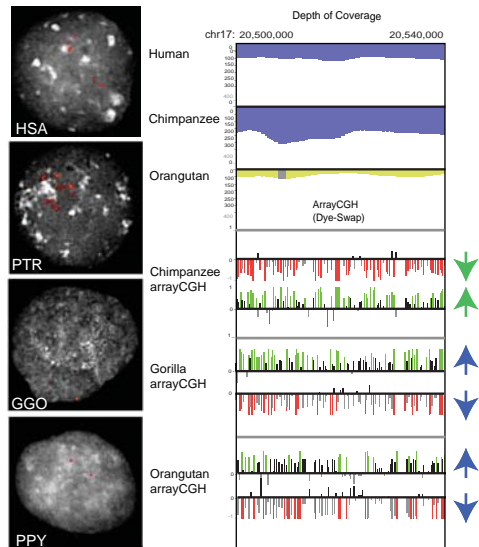

b)

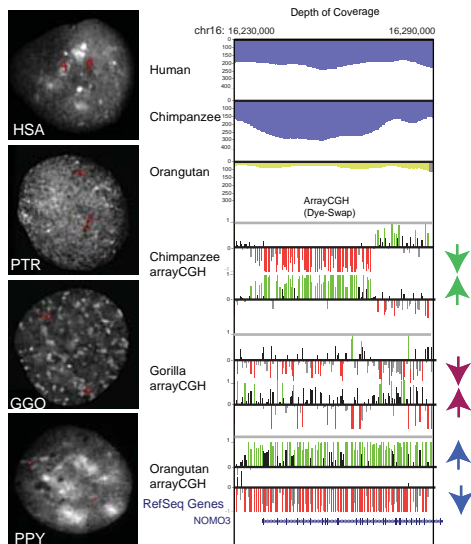

c)

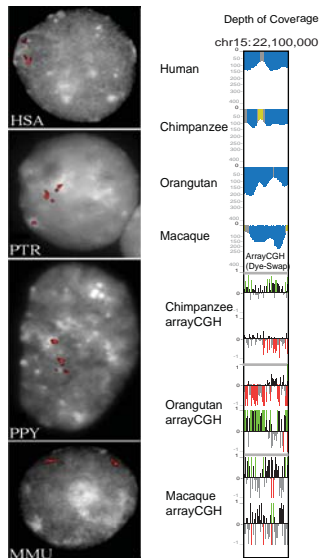

Supplement: NIHMS123506-supplement-Supp_Fig_S2.pdf [file NIHMS123506-supplement-Supp_Fig_S2.pdf]

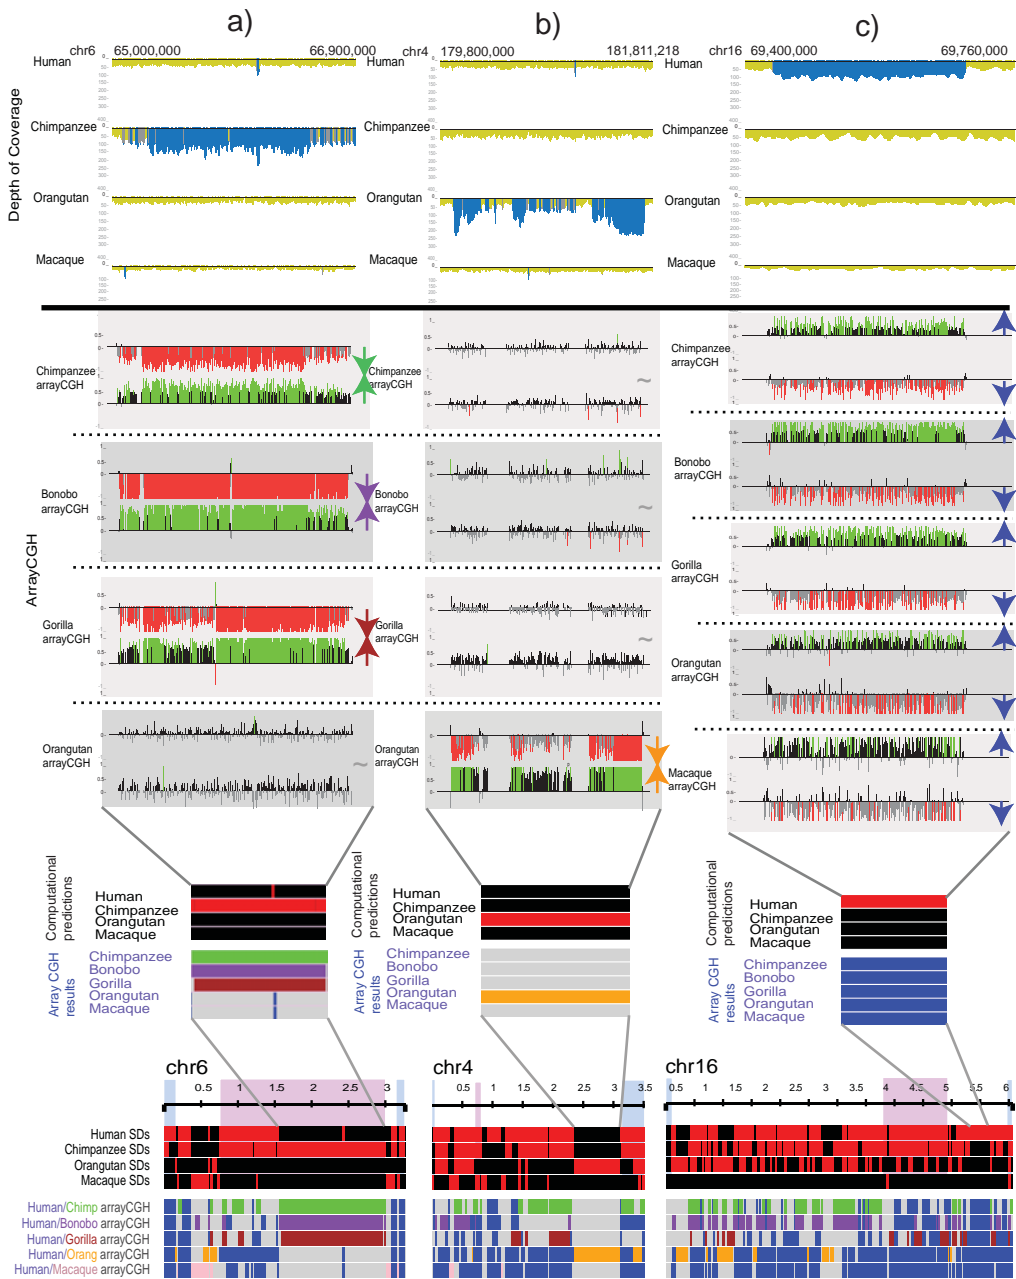

Supplement: NIHMS123506-supplement-Supp_Fig_S3.pdf [file NIHMS123506-supplement-Supp_Fig_S3.pdf]

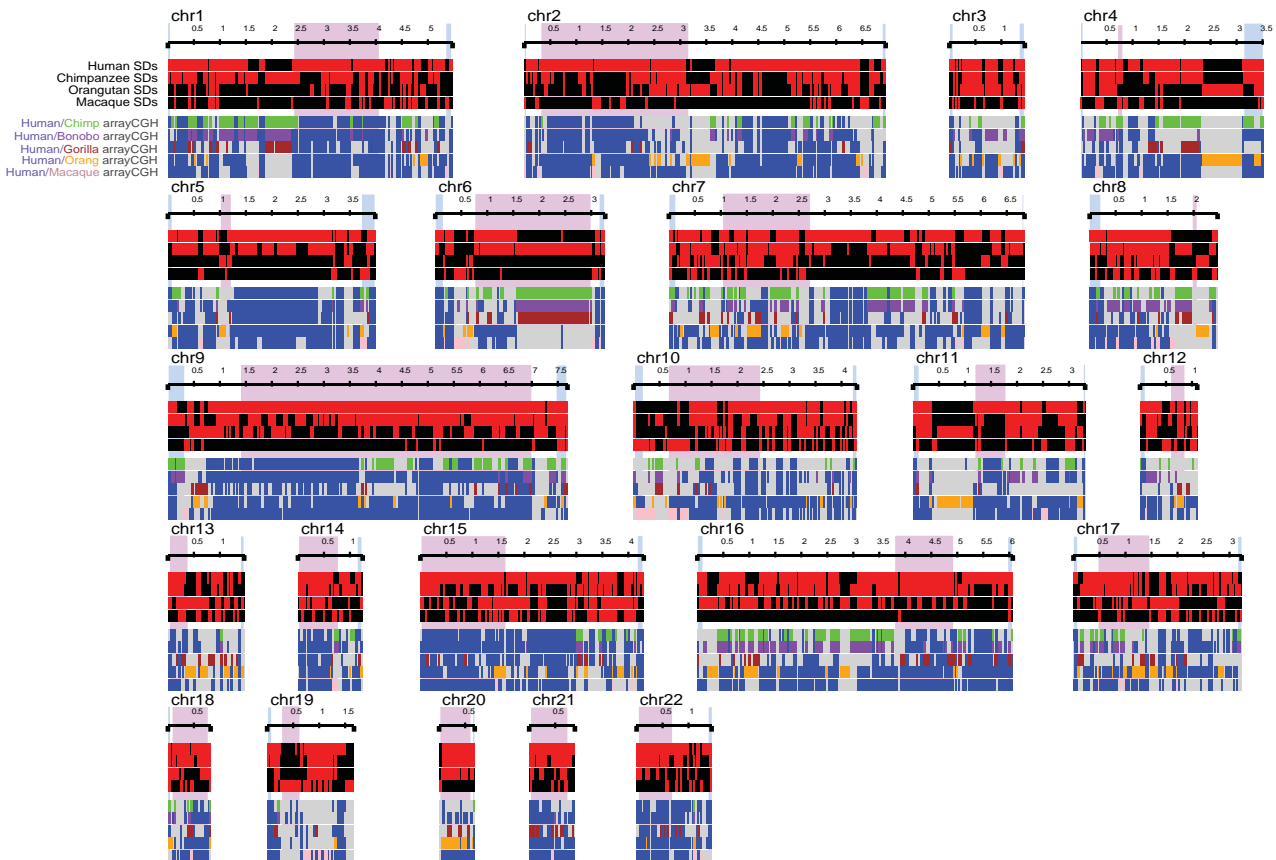

Supplement: NIHMS123506-supplement-Supp_Fig_S4.pdf [file NIHMS123506-supplement-Supp_Fig_S4.pdf]

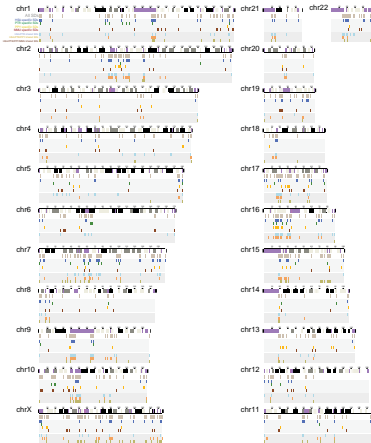

Supplement: NIHMS123506-supplement-Supp_Fig_S5.pdf [file NIHMS123506-supplement-Supp_Fig_S5.pdf]

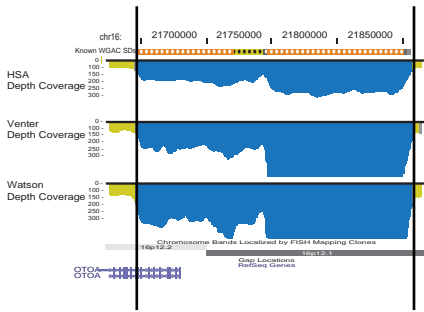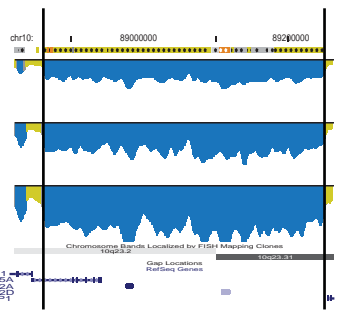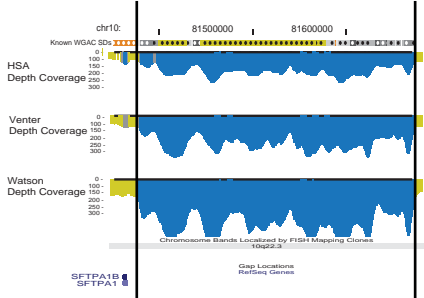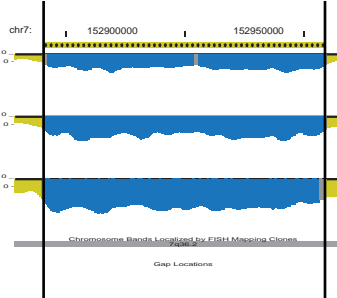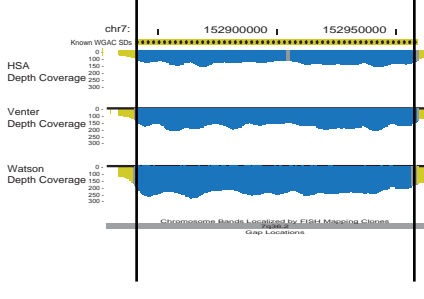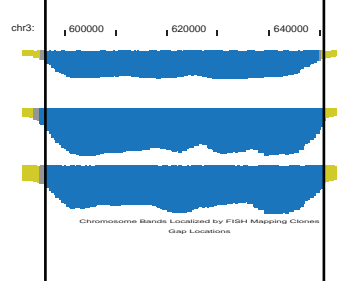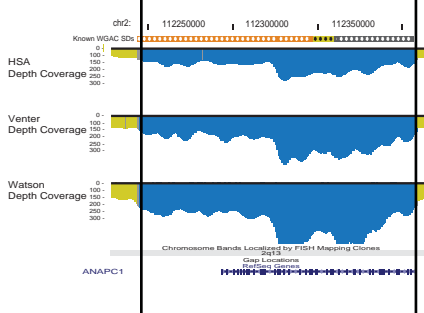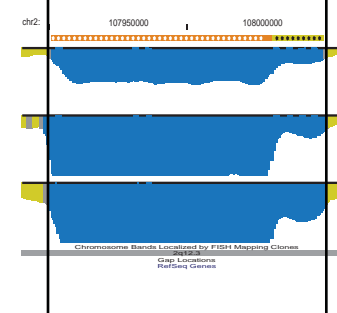

Supplement: NIHMS123506-supplement-Supp_Fig_S7.pdf [file NIHMS123506-supplement-Supp_Fig_S7.pdf]
